# Supplementary material for: Herpes Simplex Virus Infection, Acyclovir and IVIG Treatment All Independently Cause Gut Dysbiosis
Source: bioRxiv or medRxiv preprint supplement (doi:10.1101/844712), 2019-11-20
Supplement: Supplementary file [file media-1.pdf]

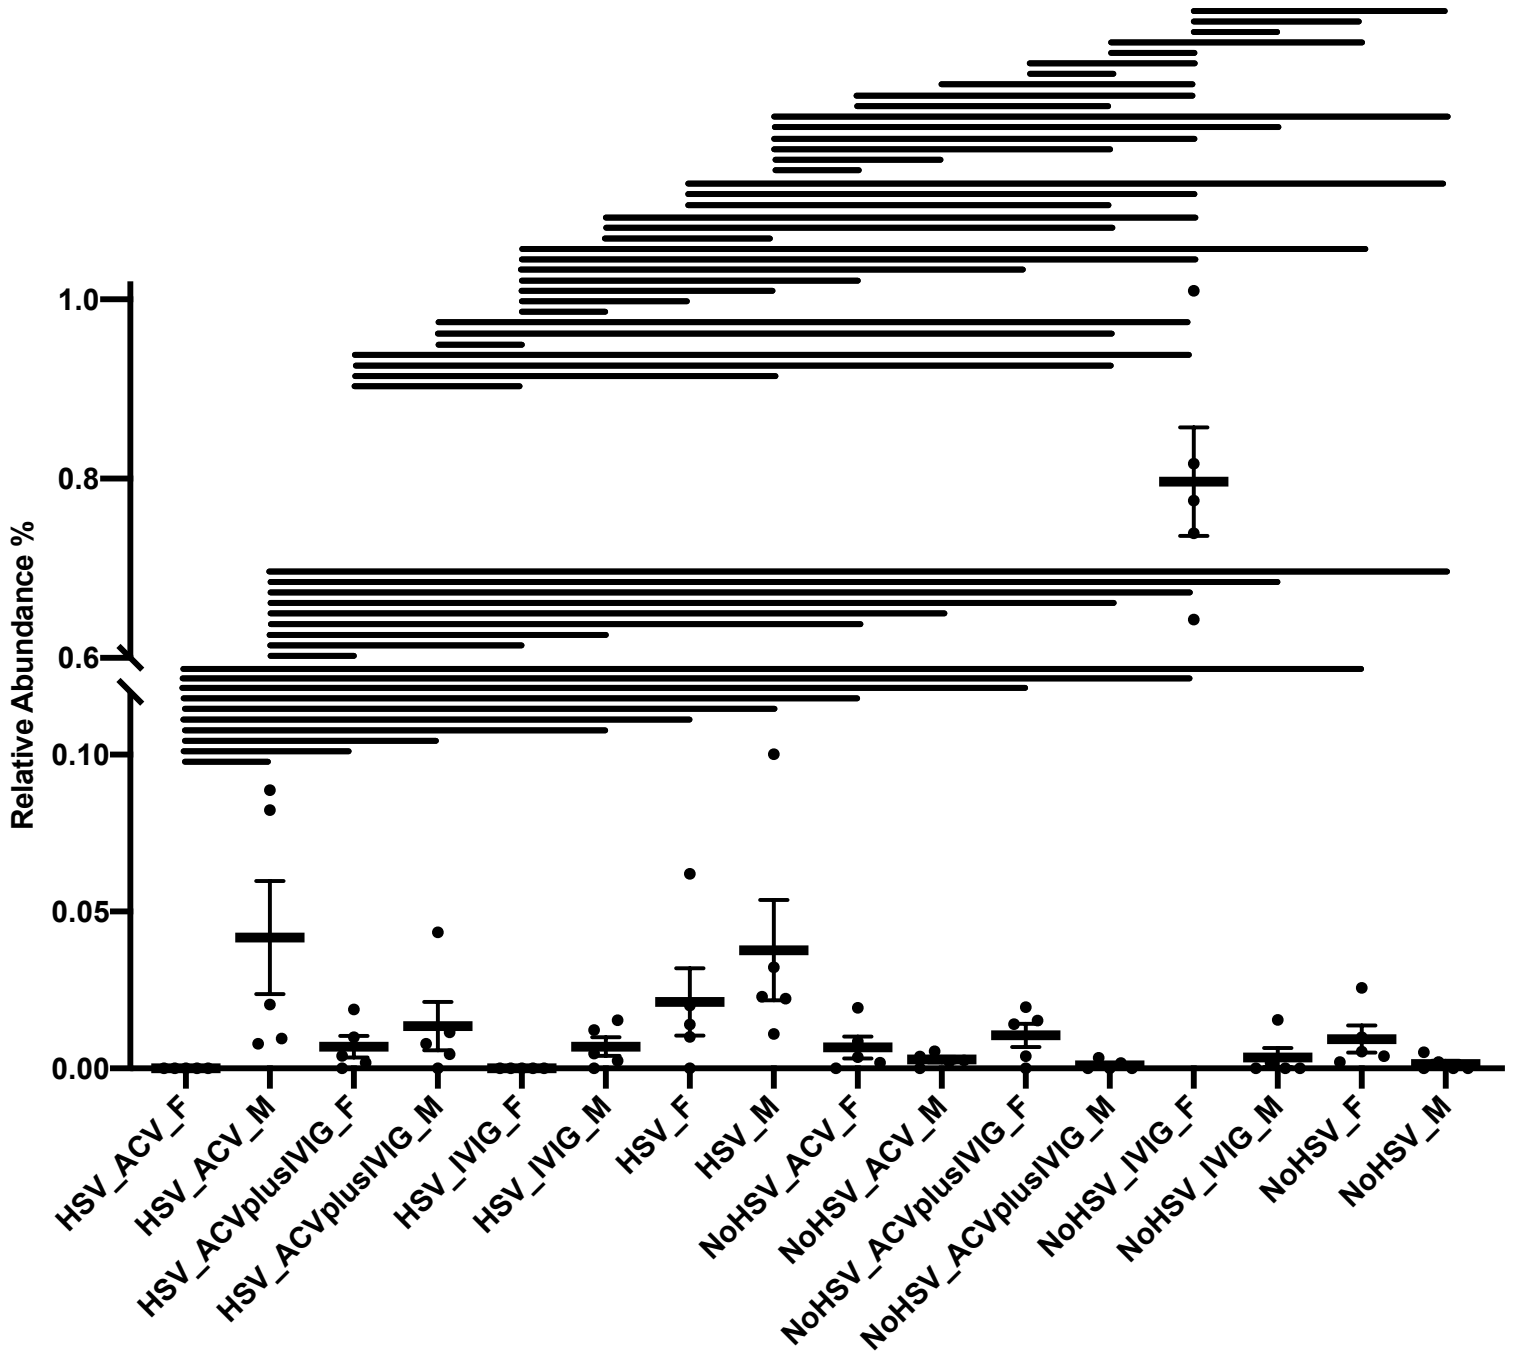

**Supplementary Figure 1. Fecal *Blautia henselii* from HSV-Infected and Uninfected Mice Treated and Not Treated with ACV and/or IVIG.** Pairwise differences are shown by horizontal lines (FDR-adjusted P values < 0.05). Bars = standard error. Females = \_F and Males = \_M.

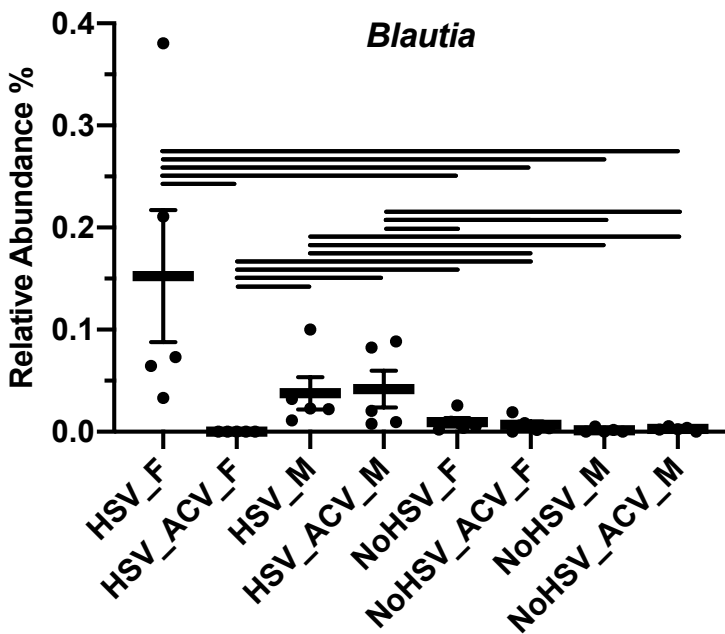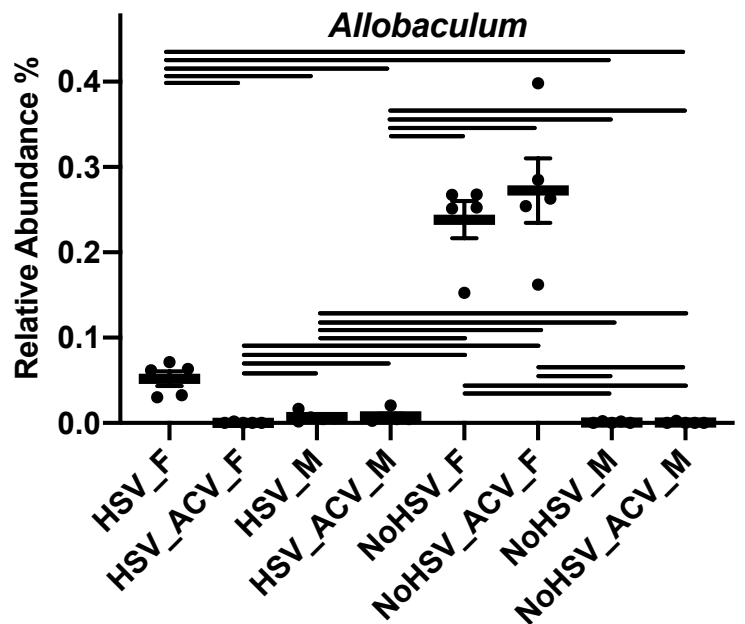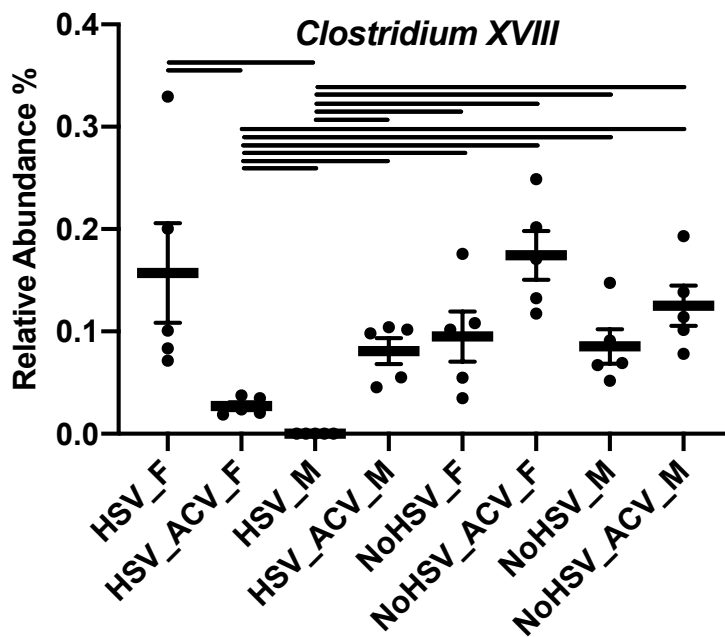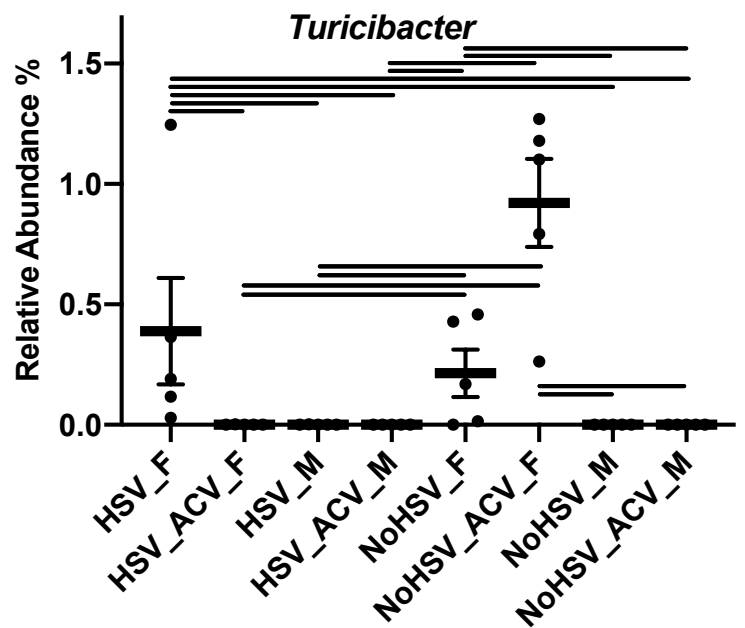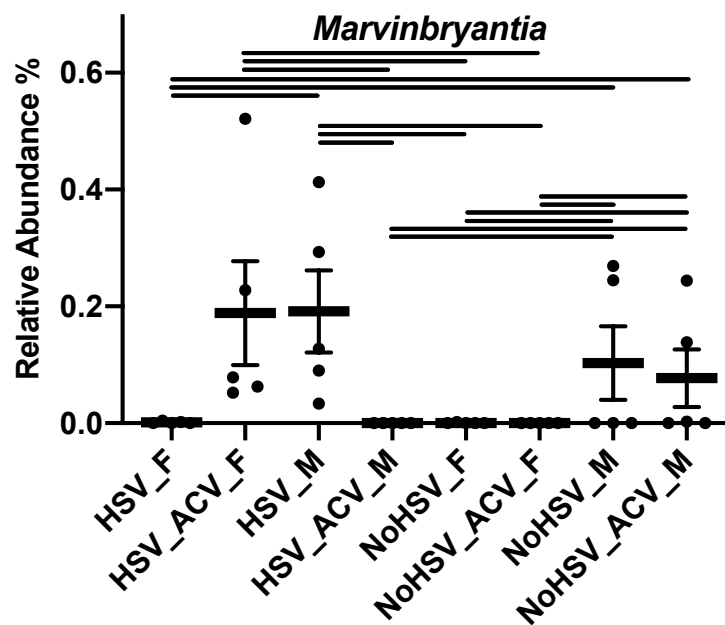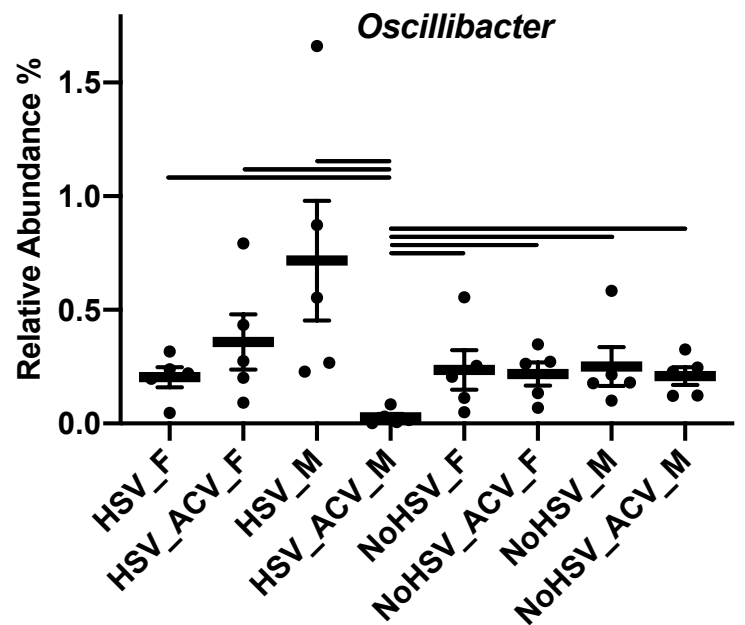

Supplementary Figure 2. Fecal Bacterial Genera from HSV-Infected and Uninfected Mice Treated and Not Treated with ACV and/or IVIG. Pairwise differences are shown by horizontal lines (FDR-adjusted P values < 0.05). Bars = standard error. Females = \_F and Males = \_M.
